# Supplementary material for: Integrated transcriptomic and proteomic analysis reveals altered expression of outer membrane proteins in Methionine sulfoxide reductases deleted mutant strain of Salmonella Typhimurium
Source: Research Square preprint supplement (doi:10.21203/rs.3.rs-8609155/v1), 2026-02-20
Supplement: Supplementary file 1 [file 27c3222cd5fc19f86f6a2e7d.pdf]

Ref: 260196

Permission is granted to Scientific Reports of Springer Nature Ltd to publish both in print and digital under the CC BY 4.0 open access license the result of using KEGG and the following KEGG images in the article "Integrated transcriptomic and proteomic analysis reveals altered expression of outer membrane proteins in Methionine sulfoxide reductases deleted mutant strain of Salmonella Typhimurium" written by Manish Mahawar and colleagues:

- Two-component system (stm02020)
- beta-Lactam resistance (stm01501)
- Lipopolysaccharide biosynthesis (stm00540)
- Cationic antimicrobial peptide (CAMP) resistance (stm01503)
- Ether lipid metabolism (stm00565)
- alpha-Linolenic acid metabolism (stm00592)
- ABC transporters (stm02010)

subject to the condition that the original source is acknowledged by citing at least one KEGG paper.

Permission granted:

*Yixuan Song*

Yixuan Song, Kanehisa Laboratories

Date: 26 January 2026

Copyright holder: Kanehisa Laboratories
